# Supplementary material for: Chromosomal DNA deletion confers phage resistance to Pseudomonas aeruginosa
Source: PubMed Central journal article supplement — Sci Rep. 2014 Apr 28;4:4738. doi: 10.1038/srep04738 (PMC4001099; doi:10.1038/srep04738), 2014-04-28
Supplement: srep04738-s1.pdf [file srep04738-s1.pdf]

1 **Chromosomal DNA deletion confers phage resistance to**

2 *Pseudomonas aeruginosa*

3

4 **Shuai Le<sup>1, 2</sup>, Xinyue Yao<sup>1</sup>, Shuguang Lu<sup>1</sup>, Yinling Tan<sup>1</sup>, Xiancai Rao<sup>1</sup>,**

5 **Ming Li<sup>1</sup>, Xiaolin Jin<sup>1</sup>, Jing Wang<sup>1</sup>, Yan Zhao<sup>1</sup>, Nicholas C. Wu<sup>3</sup>, Renate Lux<sup>2</sup>,**

6 **Xuesong He<sup>2</sup>, Wenyuan Shi<sup>2\*</sup>, Fuquan Hu<sup>1\*</sup>**

7

8 Department of Microbiology<sup>1</sup>, Third Military Medical University, Chongqing, 400038,

9 China

10 School of Dentistry<sup>2</sup>, University of California, Los Angeles, CA, 90095, USA

11 Department of Molecular and Medical Pharmacology<sup>3</sup>, University of California, Los

12 Angeles, CA 90095, USA

13

14

15

16

17

18

19

20

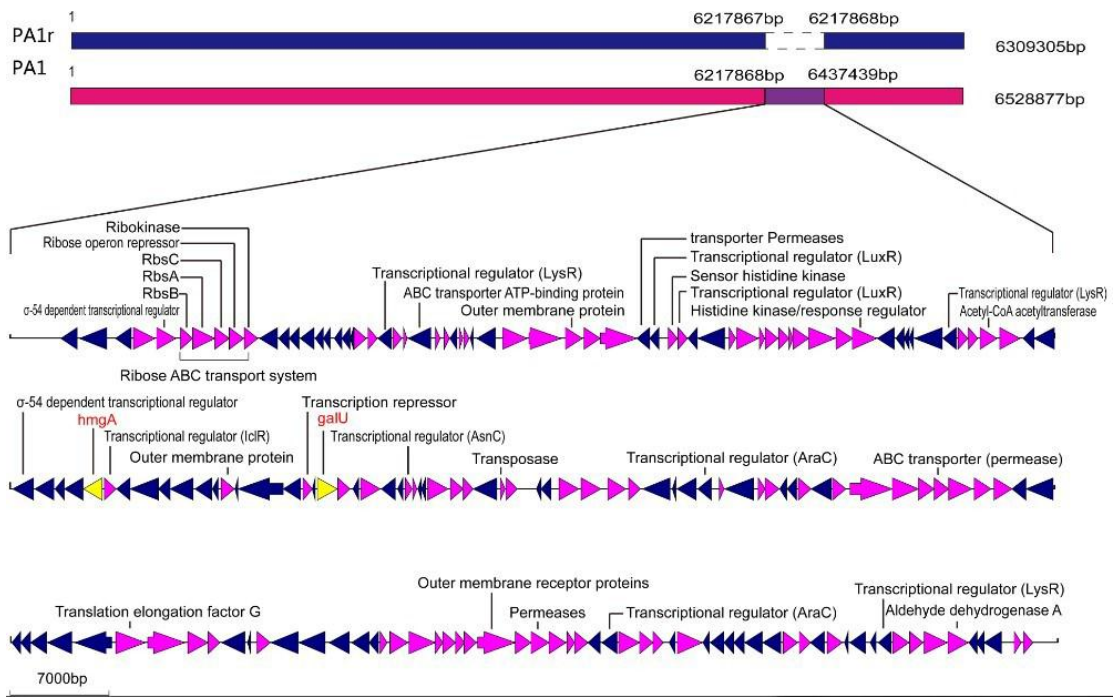

21

22 **Figure S1. Diagram of the genes in the deleted fragment in PA1r**

23

24

25

26

27

28

29

30

31

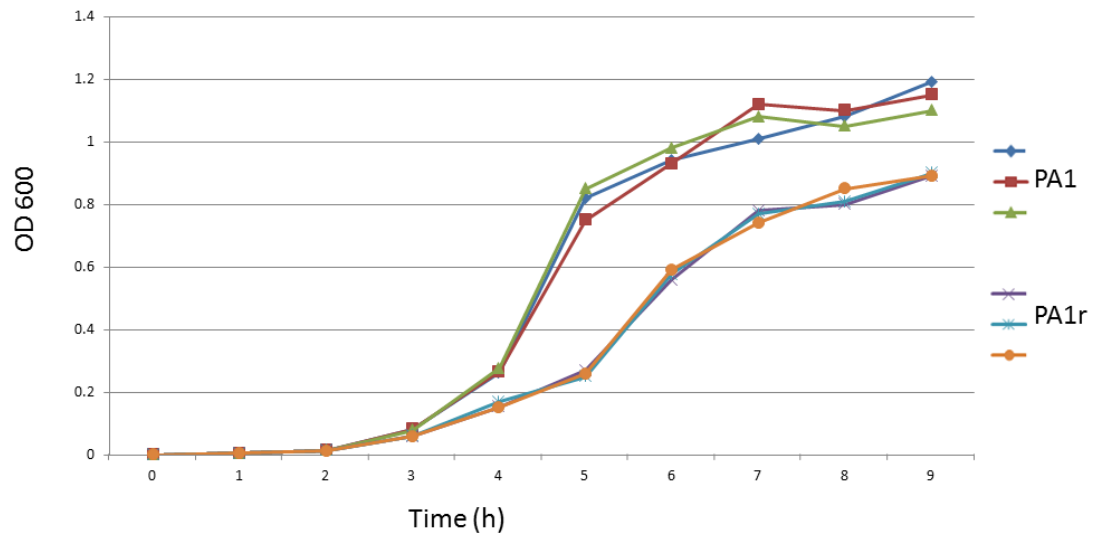

32

33 **Figure S2. Growth curves of PA1 and PA1r.** Genomic fragment deletion mutant

34 PA1r grows slower than PA1 and cannot reach a high density as PA1 (student's t test,

35  $P < 0.05$ ) . Three independent replicates were performed.

36

37

38

39

40

41

42

43

44

45

46

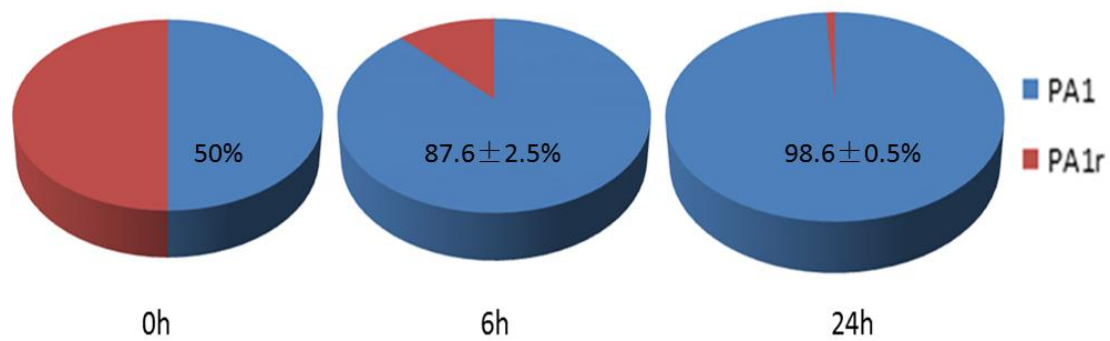

47

0h

6h

24h

48

49 **Figure S3. Competition assays of PA1 and PA1r.**  $10^6$  cfu of PA1 and PA1r were  
 50 mixed in 1 ml LB and grown at 37 °C with shaking. The mixed culture was inoculated  
 51 onto LB plates at 6 h and 24 h. The ratios of red and non-red colonies were calculated.  
 52 PA1r was outcompeted by wide type strain PA1 in the competition assays. Three  
 53 independent replicates were performed. (One-Way ANOVA test,  $P < 0.05$ )

54

55

56
